# Supplementary material for: Investigation of the curative effects of palm vitamin E tocotrienols on autoimmune arthritis disease in vivo
Source: PubMed Central journal article supplement (PMC6856359; doi:10.1038/s41598-019-53424-7), 2019-11-14
Supplement: 41598_2019_53424_MOESM1_ESM.pdf [file 41598_2019_53424_MOESM1_ESM.pdf]

**Investigation of the curative effects of palm vitamin E tocotrienols on autoimmune arthritis disease *in vivo***

**\*Zaida Zainal<sup>1</sup>, Afiqah Abdul Rahim<sup>1</sup>, Ammu Kutty Radhakrishnan<sup>2</sup>, Sui Kiat Chang<sup>3</sup>, Huzwah Khaza'ai<sup>4</sup>**

<sup>1</sup>Nutrition Unit, Department of Product Development and Advisory Services (PDAS), Malaysian Palm Oil Board, Bandar Baru Bangi, Selangor 43000, Malaysia

<sup>2</sup>Jeffrey Cheah School of Medicine and Health Sciences, Monash University Malaysia, Jalan Lagoon Selatan, Bandar Sunway, 47500 Subang Jaya, Selangor

<sup>3</sup>Department of Nutrition and Dietetics, School of Health Sciences, International Medical University, 57000 Bukit Jalil, Kuala Lumpur, Malaysia

<sup>4</sup>Faculty of Medicine and Health Sciences, Universiti Putra Malaysia, Serdang 43400, Malaysia

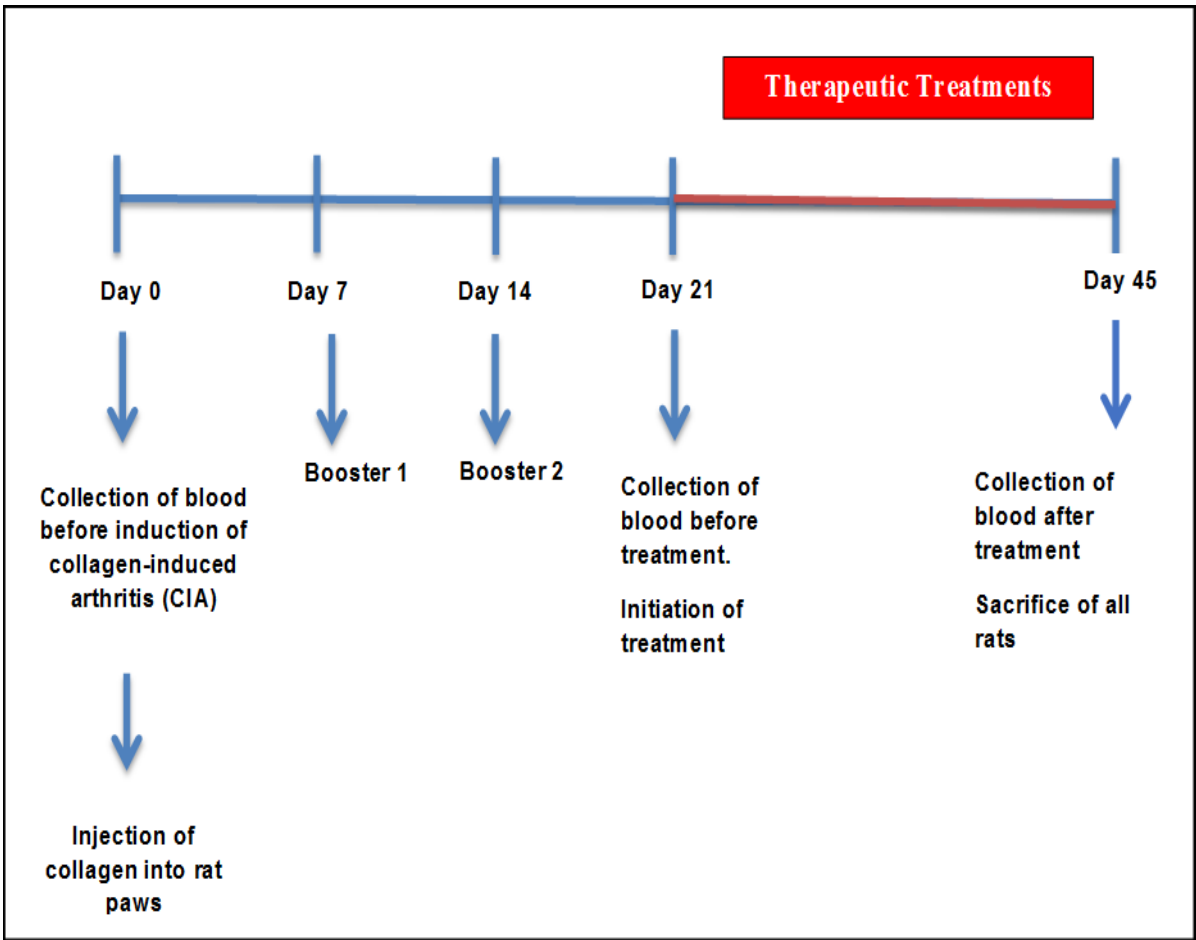

**Supplementary Figure S1.** Study design for DA rats induced by CIA and treated with tocotrienol. Experimental design for arthritis. Normal SPF Dark Agouti rats were injected with collagen to generate collagen-induced arthritis (CIA), except in the control group. Rats were divided into the control, arthritis, and TRF-treated groups (n = 10/group). Animals were sacrificed after 45 days.
